# Supplementary material
Source: Research Square preprint supplement (doi:10.21203/rs.3.rs-8796299/v1)
Supplement: Supplementary file 1 [file b0d57fd1f2998df411c9b6e6.docx]

**Mixed-species aquatic weed fertilizers enhance Brassica rapa growth through nutrient synergy in a circular nutrient recovery system**

Cedric Mankponse Antoine Assogba1* and Nakashima Yoshitaka1

1Graduate School of Environmental, Life, Natural Science and Technology, Okayama University, Japan

*Corresponding author email: aantoinecedric1@gmail.com

**Supplementary material list**

[S0. Collection sites of submerged aquatic weed biomass 2](#_Toc220065695)

[Table S0.1. Collection sites of submerged aquatic weed biomass used in this study. 2](#_Toc220065696)

[S1. Effects of fertilizer treatments on total plant biomass 2](#_Toc220065697)

[Table S1.1. Factorial ANOVA results for total fresh biomass 2](#_Toc220065698)

[Table S1.2. Factorial ANOVA results for total dry biomass 2](#_Toc220065699)

[Table S1.3. One-way ANOVA results for total fresh biomass across fertilizer treatments 3](#_Toc220065700)

[Table S1.4. One-way ANOVA results for total dry biomass across fertilizer treatments 3](#_Toc220065701)

[S2. Effects of fertilizer treatments on shoot biomass production 3](#_Toc220065702)

[Table S2.1. Factorial ANOVA results for shoot fresh biomass 3](#_Toc220065703)

[Table S2.2. Factorial ANOVA results for shoot dry biomass 3](#_Toc220065704)

[S3. Root biomass responses to fertilizer treatments 4](#_Toc220065705)

[Table S3.1. Factorial ANOVA results for root fresh biomass 4](#_Toc220065706)

[Table S3.2. Factorial ANOVA results for root dry biomass 4](#_Toc220065707)

[Table S3.3. One-way ANOVA results for root fresh biomass across fertilizer treatments 5](#_Toc220065708)

[Table S3.4. One-way ANOVA results for root dry biomass across fertilizer treatments 5](#_Toc220065709)

[Table S3.5. Tukey’s HSD post hoc grouping for root fresh biomass 5](#_Toc220065710)

[Table S3.6. Tukey’s HSD post hoc grouping for root dry biomass 6](#_Toc220065711)

[S4. Biomass allocation patterns (shoot to root ratios) 6](#_Toc220065712)

[Table S4.1. Factorial ANOVA results for log-transformed shoot-to-root ratio based on fresh biomass 6](#_Toc220065713)

[Table S4.2. Factorial ANOVA results for log-transformed shoot-to-root ratio based on dry biomass 7](#_Toc220065714)

[Table S4.3. One-way ANOVA results for log-transformed shoot-to-root ratio based on fresh biomass 7](#_Toc220065715)

[Table S4.4. One-way ANOVA results for log-transformed shoot-to-root ratio based on dry biomass 7](#_Toc220065716)

[Table S4.5. Tukey’s HSD post hoc grouping for log-transformed shoot-to-root ratio (fresh biomass) 7](#_Toc220065717)

[Table S4.6. Tukey’s HSD post hoc grouping for log-transformed shoot-to-root ratio (dry biomass) 8](#_Toc220065718)

[S5. Effects of aquatic-weed fertilizers on plant morphology and physiological status 9](#_Toc220065719)

[Table S5.1. Factorial ANOVA results for plant height 9](#_Toc220065720)

[Table S5.2. Factorial ANOVA results for leaf number 9](#_Toc220065721)

[Table S5.3. One-way ANOVA results for plant height across fertilizer treatments 9](#_Toc220065722)

[Table S5.4. One-way ANOVA results for leaf number across fertilizer treatments 10](#_Toc220065723)

[Table S5.5. Factorial ANOVA results for chlorophyll index (SPAD) 10](#_Toc220065724)

[Table S5.6. One-way ANOVA results for chlorophyll index (SPAD) across fertilizer treatments 10](#_Toc220065725)

[Table S5.7. Tukey’s HSD post hoc grouping for chlorophyll index (SPAD) 10](#_Toc220065726)

# S0. Collection sites of submerged aquatic weed biomass

## **Table S0.1.** Collection sites of submerged aquatic weed biomass used in this study.

| **Species** | **Collection site** | **Coordinates** | **City / Prefecture** |
| --- | --- | --- | --- |
| *Egeria densa* | Urayasu Nishimachi water body | 34°37′07.1″N, 133°54′40.0″E | Okayama, Japan |
| *Elodea nuttallii* | Urayasu Nishimachi water body | 34°37′07.1″N, 133°54′40.0″E | Okayama, Japan |
| *Vallisneria* sp. | Minami Ward water body | 34°37′09.3″N, 133°54′38.4″E | Okayama, Japan |

# S1. Effects of fertilizer treatments on total plant biomass

## **Table S1.1.** Factorial ANOVA results for total fresh biomass

| **Source of variation** | **Sum Sq** | **Df** | **F value** | **Pr(>F)** |
| --- | --- | --- | --- | --- |
| Type | 289.2749 | 3 | 4.913527 | 0.003668 |
| Dose | 12.20375 | 2 | 0.310933 | 0.733742 |
| Form | 0.08 | 1 | 0.004077 | 0.949268 |
| Type:Dose | 257.1478 | 6 | 2.183914 | 0.054299 |
| Type:Form | 20.98793 | 3 | 0.356494 | 0.784577 |
| Dose:Form | 31.43606 | 2 | 0.800944 | 0.452864 |
| Type:Dose:Form | 217.2847 | 6 | 1.845363 | 0.102284 |
| Residuals | 1412.956 | 72 | NA | NA |

## **Table S1.2.** Factorial ANOVA results for total dry biomass

| **Source of variation** | **Sum Sq** | **Df** | **F value** | **Pr(>F)** |
| --- | --- | --- | --- | --- |
| Type | 15.02653 | 3 | 3.522164 | 0.019199 |
| Dose | 0.4082 | 2 | 0.143521 | 0.86655 |
| Form | 0.015313 | 1 | 0.010768 | 0.917643 |
| Type:Dose | 15.24672 | 6 | 1.786889 | 0.113875 |
| Type:Form | 0.742134 | 3 | 0.173954 | 0.913684 |
| Dose:Form | 3.875108 | 2 | 1.362468 | 0.262549 |
| Type:Dose:Form | 13.0047 | 6 | 1.524128 | 0.18257 |
| Residuals | 102.3906 | 72 | NA | NA |

## **Table S1.3.** One-way ANOVA results for total fresh biomass across fertilizer treatments

| **Source of variation** | **Df** | **Sum Sq** | **Mean Sq** | **F value** | **Pr(>F)** |
| --- | --- | --- | --- | --- | --- |
| Treatment | 25 | 2310.974 | 92.43896 | 4.907195 | 3.25E-08 |
| Residuals | 78 | 1469.32 | 18.83743 | NA | NA |

## **Table S1.4.** One-way ANOVA results for total dry biomass across fertilizer treatments

| **Source of variation** | **Df** | **Sum Sq** | **Mean Sq** | **F value** | **Pr(>F)** |
| --- | --- | --- | --- | --- | --- |
| Treatment | 25 | 117.4723 | 4.698891 | 3.493741 | 1.26E-05 |
| Residuals | 78 | 104.9057 | 1.344945 | NA | NA |

# S2. Effects of fertilizer treatments on shoot biomass production

## **Table S2.1.** Factorial ANOVA results for shoot fresh biomass

| **Source of variation** | **Sum Sq** | **Df** | **F value** | **Pr(>F)** |
| --- | --- | --- | --- | --- |
| Type | 200.8135 | 3 | 5.846481 | 0.001244 |
| Dose | 12.46995 | 2 | 0.544575 | 0.582459 |
| Form | 0.18 | 1 | 0.015722 | 0.900568 |
| Type:Dose | 176.8863 | 6 | 2.574932 | 0.025711 |
| Type:Form | 13.81171 | 3 | 0.402114 | 0.751902 |
| Dose:Form | 13.04291 | 2 | 0.569597 | 0.568282 |
| Type:Dose:Form | 127.2259 | 6 | 1.852027 | 0.101036 |
| Residuals | 824.3462 | 72 | NA | NA |

## **Table S2.2.** Factorial ANOVA results for shoot dry biomass

| **Source of variation** | **Sum Sq** | **Df** | **F value** | **Pr(>F)** |
| --- | --- | --- | --- | --- |
| Type | 6.860519 | 3 | 4.397627 | 0.006739 |
| Dose | 0.158817 | 2 | 0.152703 | 0.858662 |
| Form | 0.00125 | 1 | 0.002404 | 0.961033 |
| Type:Dose | 7.074688 | 6 | 2.267455 | 0.046334 |
| Type:Form | 0.280262 | 3 | 0.17965 | 0.909875 |
| Dose:Form | 1.125008 | 2 | 1.081704 | 0.344462 |
| Type:Dose:Form | 4.77404 | 6 | 1.530092 | 0.180664 |
| Residuals | 37.4412 | 72 | NA | NA |

# S3. Root biomass responses to fertilizer treatments

## **Table S3.1.** Factorial ANOVA results for root fresh biomass

| **Source of variation** | **Sum Sq** | **Df** | **F value** | **Pr(>F)** |
| --- | --- | --- | --- | --- |
| Type | 8.835275 | 3 | 1.946808 | 0.129704 |
| Dose | 0.44345 | 2 | 0.146568 | 0.863924 |
| Form | 0.5 | 1 | 0.330517 | 0.567147 |
| Type:Dose | 8.536496 | 6 | 0.940487 | 0.471685 |
| Type:Form | 2.613784 | 3 | 0.575934 | 0.632682 |
| Dose:Form | 3.991233 | 2 | 1.319172 | 0.27374 |
| Type:Dose:Form | 12.62786 | 6 | 1.391242 | 0.229913 |
| Residuals | 108.9202 | 72 | NA | NA |

## **Table S3.2.** Factorial ANOVA results for root dry biomass

| **Source of variation** | **Sum Sq** | **Df** | **F value** | **Pr(>F)** |
| --- | --- | --- | --- | --- |
| Type | 1.631969 | 3 | 1.877159 | 0.141094 |
| Dose | 0.286217 | 2 | 0.493828 | 0.612338 |
| Form | 0.007813 | 1 | 0.026959 | 0.870041 |
| Type:Dose | 2.333929 | 6 | 1.342292 | 0.249863 |
| Type:Form | 0.267109 | 3 | 0.30724 | 0.82007 |
| Dose:Form | 0.8377 | 2 | 1.445337 | 0.242422 |
| Type:Dose:Form | 2.13569 | 6 | 1.22828 | 0.302041 |
| Residuals | 20.86518 | 72 | NA | NA |

## **Table S3.3.** One-way ANOVA results for root fresh biomass across fertilizer treatments

| **Source of variation** | **Df** | **Sum Sq** | **Mean Sq** | **F value** | **Pr(>F)** |
| --- | --- | --- | --- | --- | --- |
| Treatment | 25 | 70.0278 | 2.801112 | 1.888757 | 0.017912 |
| Residuals | 78 | 115.6775 | 1.483045 | NA | NA |

## **Table S3.4.** One-way ANOVA results for root dry biomass across fertilizer treatments

| **Source of variation** | **Df** | **Sum Sq** | **Mean Sq** | **F value** | **Pr(>F)** |
| --- | --- | --- | --- | --- | --- |
| Treatment | 25 | 13.0682 | 0.522728 | 1.903853 | 0.016769 |
| Residuals | 78 | 21.41593 | 0.274563 | NA | NA |

## **Table S3.5.** Tukey’s HSD post hoc grouping for root fresh biomass

| **Treatment** | **emmean** | **SE** | **df** | **lower.CL** | **upper.CL** | **.group** |
| --- | --- | --- | --- | --- | --- | --- |
| ED-H-R | 4.9775 | 0.608902 | 78 | 3.027294 | 6.927706 | a |
| EN-H-E | 4.6775 | 0.608902 | 78 | 2.727294 | 6.627706 | ab |
| EN-O-E | 4.315 | 0.608902 | 78 | 2.364794 | 6.265206 | ab |
| MX-H-R | 4.27 | 0.608902 | 78 | 2.319794 | 6.220206 | ab |
| CTRL | 4.1525 | 0.608902 | 78 | 2.202294 | 6.102706 | ab |
| EN-L-R | 4.0825 | 0.608902 | 78 | 2.132294 | 6.032706 | ab |
| MX-L-R | 3.95 | 0.608902 | 78 | 1.999794 | 5.900206 | ab |
| MX-H-E | 3.6925 | 0.608902 | 78 | 1.742294 | 5.642706 | ab |
| MX-L-E | 3.6125 | 0.608902 | 78 | 1.662294 | 5.562706 | ab |
| ED-L-R | 3.6075 | 0.608902 | 78 | 1.657294 | 5.557706 | ab |
| MX-O-R | 3.5725 | 0.608902 | 78 | 1.622294 | 5.522706 | ab |
| ED-O-E | 3.54 | 0.608902 | 78 | 1.589794 | 5.490206 | ab |
| MX-O-E | 3.52 | 0.608902 | 78 | 1.569794 | 5.470206 | ab |
| ED-O-R | 3.395 | 0.608902 | 78 | 1.444794 | 5.345206 | ab |
| ED-H-E | 3.1625 | 0.608902 | 78 | 1.212294 | 5.112706 | ab |
| EN-H-R | 3.1475 | 0.608902 | 78 | 1.197294 | 5.097706 | ab |
| ED-L-E | 3.1075 | 0.608902 | 78 | 1.157294 | 5.057706 | ab |
| EN-O-R | 3.095 | 0.608902 | 78 | 1.144794 | 5.045206 | ab |
| COMM | 3.035 | 0.608902 | 78 | 1.084794 | 4.985206 | ab |
| VA-L-R | 2.8725 | 0.608902 | 78 | 0.922294 | 4.822706 | ab |
| VA-H-R | 2.8375 | 0.608902 | 78 | 0.887294 | 4.787706 | ab |
| VA-O-E | 2.39 | 0.608902 | 78 | 0.439794 | 4.340206 | ab |
| EN-L-E | 2.3175 | 0.608902 | 78 | 0.367294 | 4.267706 | ab |
| VA-H-E | 2.075 | 0.608902 | 78 | 0.124794 | 4.025206 | ab |
| VA-O-R | 1.875 | 0.608902 | 78 | -0.07521 | 3.825206 | ab |
| VA-L-E | 1.6675 | 0.608902 | 78 | -0.28271 | 3.617706 | b |

## **Table S3.6.** Tukey’s HSD post hoc grouping for root dry biomass

| **Treatment** | **emmean** | **SE** | **df** | **lower.CL** | **upper.CL** | **.group** |
| --- | --- | --- | --- | --- | --- | --- |
| EN-O-E | 1.995 | 0.261994 | 78 | 1.155879 | 2.834121 | a |
| ED-H-R | 1.905 | 0.261994 | 78 | 1.065879 | 2.744121 | a |
| EN-H-E | 1.8225 | 0.261994 | 78 | 0.983379 | 2.661621 | a |
| MX-H-R | 1.6875 | 0.261994 | 78 | 0.848379 | 2.526621 | a |
| MX-L-R | 1.635 | 0.261994 | 78 | 0.795879 | 2.474121 | a |
| MX-L-E | 1.515 | 0.261994 | 78 | 0.675879 | 2.354121 | a |
| ED-O-E | 1.495 | 0.261994 | 78 | 0.655879 | 2.334121 | a |
| MX-O-R | 1.445 | 0.261994 | 78 | 0.605879 | 2.284121 | a |
| CTRL | 1.4325 | 0.261994 | 78 | 0.593379 | 2.271621 | a |
| EN-L-R | 1.4075 | 0.261994 | 78 | 0.568379 | 2.246621 | a |
| MX-H-E | 1.3675 | 0.261994 | 78 | 0.528379 | 2.206621 | a |
| ED-O-R | 1.3525 | 0.261994 | 78 | 0.513379 | 2.191621 | a |
| EN-O-R | 1.2325 | 0.261994 | 78 | 0.393379 | 2.071621 | a |
| ED-L-R | 1.225 | 0.261994 | 78 | 0.385879 | 2.064121 | a |
| MX-O-E | 1.21 | 0.261994 | 78 | 0.370879 | 2.049121 | a |
| EN-H-R | 1.1775 | 0.261994 | 78 | 0.338379 | 2.016621 | a |
| ED-H-E | 1.1725 | 0.261994 | 78 | 0.333379 | 2.011621 | a |
| ED-L-E | 1.1625 | 0.261994 | 78 | 0.323379 | 2.001621 | a |
| VA-L-R | 1.0575 | 0.261994 | 78 | 0.218379 | 1.896621 | a |
| VA-H-R | 0.9875 | 0.261994 | 78 | 0.148379 | 1.826621 | a |
| COMM | 0.9425 | 0.261994 | 78 | 0.103379 | 1.781621 | a |
| EN-L-E | 0.9175 | 0.261994 | 78 | 0.078379 | 1.756621 | a |
| VA-O-E | 0.87 | 0.261994 | 78 | 0.030879 | 1.709121 | a |
| VA-H-E | 0.78 | 0.261994 | 78 | -0.05912 | 1.619121 | a |
| VA-O-R | 0.685 | 0.261994 | 78 | -0.15412 | 1.524121 | a |
| VA-L-E | 0.6475 | 0.261994 | 78 | -0.19162 | 1.486621 | a |

# S4. Biomass allocation patterns (shoot to root ratios)

## **Table S4.1.** Factorial ANOVA results for log-transformed shoot-to-root ratio based on fresh biomass

| **Source of variation** | **Sum Sq** | **Df** | **F value** | **Pr(>F)** |
| --- | --- | --- | --- | --- |
| Type | 0.24777 | 3 | 1.559775 | 0.206592 |
| Dose | 0.108232 | 2 | 1.022022 | 0.365027 |
| Form | 0.053603 | 1 | 1.012332 | 0.317714 |
| Type:Dose | 0.162964 | 6 | 0.512951 | 0.796653 |
| Type:Form | 0.082134 | 3 | 0.517055 | 0.671863 |
| Dose:Form | 0.030932 | 2 | 0.292084 | 0.747586 |
| Type:Dose:Form | 0.071972 | 6 | 0.226541 | 0.966849 |
| Residuals | 3.812388 | 72 | NA | NA |

## **Table S4.2.** Factorial ANOVA results for log-transformed shoot-to-root ratio based on dry biomass

| **Source of variation** | **Sum Sq** | **Df** | **F value** | **Pr(>F)** |
| --- | --- | --- | --- | --- |
| Type | 0.297505 | 3 | 1.526732 | 0.2149 |
| Dose | 0.207392 | 2 | 1.596432 | 0.209706 |
| Form | 0.022957 | 1 | 0.353424 | 0.554045 |
| Type:Dose | 0.471642 | 6 | 1.210181 | 0.311089 |
| Type:Form | 0.028429 | 3 | 0.145893 | 0.931996 |
| Dose:Form | 0.009188 | 2 | 0.070723 | 0.931785 |
| Type:Dose:Form | 0.069593 | 6 | 0.178568 | 0.98185 |
| Residuals | 4.67674 | 72 | NA | NA |

## **Table S4.3.** One-way ANOVA results for log-transformed shoot-to-root ratio based on fresh biomass

| **Source of variation** | **Df** | **Sum Sq** | **Mean Sq** | **F value** | **Pr(>F)** |
| --- | --- | --- | --- | --- | --- |
| Treatment | 25 | 3.475094 | 0.139004 | 2.754988 | 0.000355 |
| Residuals | 78 | 3.935514 | 0.050455 | NA | NA |

## **Table S4.4.** One-way ANOVA results for log-transformed shoot-to-root ratio based on dry biomass

| **Source of variation** | **Df** | **Sum Sq** | **Mean Sq** | **F value** | **Pr(>F)** |
| --- | --- | --- | --- | --- | --- |
| Treatment | 25 | 4.128162 | 0.165126 | 2.622607 | 0.000651 |
| Residuals | 78 | 4.911094 | 0.062963 | NA | NA |

## **Table S4.5.** Tukey’s HSD post hoc grouping for log-transformed shoot-to-root ratio (fresh biomass)

| **Treatment** | **emmean** | **SE** | **df** | **lower.CL** | **upper.CL** | **.group** |
| --- | --- | --- | --- | --- | --- | --- |
| MX-O-R | 1.68599 | 0.112311 | 78 | 1.326277 | 2.045704 | a |
| MX-L-R | 1.608702 | 0.112311 | 78 | 1.248989 | 1.968416 | ab |
| MX-L-E | 1.608411 | 0.112311 | 78 | 1.248698 | 1.968125 | ab |
| MX-H-R | 1.527485 | 0.112311 | 78 | 1.167771 | 1.887198 | abc |
| MX-O-E | 1.526791 | 0.112311 | 78 | 1.167078 | 1.886505 | abc |
| MX-H-E | 1.49353 | 0.112311 | 78 | 1.133816 | 1.853243 | abc |
| EN-H-E | 1.421733 | 0.112311 | 78 | 1.062019 | 1.781446 | abc |
| ED-H-E | 1.407839 | 0.112311 | 78 | 1.048126 | 1.767553 | abc |
| EN-O-E | 1.404588 | 0.112311 | 78 | 1.044875 | 1.764302 | abc |
| VA-L-E | 1.388622 | 0.112311 | 78 | 1.028908 | 1.748335 | abc |
| VA-O-E | 1.352649 | 0.112311 | 78 | 0.992936 | 1.712363 | abc |
| EN-L-E | 1.32128 | 0.112311 | 78 | 0.961567 | 1.680994 | abc |
| VA-O-R | 1.310039 | 0.112311 | 78 | 0.950326 | 1.669753 | abc |
| VA-H-E | 1.291853 | 0.112311 | 78 | 0.93214 | 1.651567 | abc |
| ED-L-E | 1.289562 | 0.112311 | 78 | 0.929849 | 1.649276 | abc |
| EN-H-R | 1.286443 | 0.112311 | 78 | 0.92673 | 1.646157 | abc |
| COMM | 1.269276 | 0.112311 | 78 | 0.909562 | 1.628989 | abc |
| VA-L-R | 1.196237 | 0.112311 | 78 | 0.836524 | 1.55595 | abc |
| VA-H-R | 1.192354 | 0.112311 | 78 | 0.832641 | 1.552068 | abc |
| ED-O-E | 1.175222 | 0.112311 | 78 | 0.815509 | 1.534936 | abc |
| ED-H-R | 1.143865 | 0.112311 | 78 | 0.784152 | 1.503579 | abc |
| EN-O-R | 1.126745 | 0.112311 | 78 | 0.767032 | 1.486459 | abc |
| ED-L-R | 1.125851 | 0.112311 | 78 | 0.766138 | 1.485564 | abc |
| ED-O-R | 1.086516 | 0.112311 | 78 | 0.726803 | 1.44623 | abc |
| EN-L-R | 1.04163 | 0.112311 | 78 | 0.681916 | 1.401343 | bc |
| CTRL | 0.96587 | 0.112311 | 78 | 0.606157 | 1.325583 | c |

## **Table S4.6.** Tukey’s HSD post hoc grouping for log-transformed shoot-to-root ratio (dry biomass)

| **Treatment** | **emmean** | **SE** | **df** | **lower.CL** | **upper.CL** | **.group** |
| --- | --- | --- | --- | --- | --- | --- |
| MX-O-E | 0.954048 | 0.125462 | 78 | 0.552216 | 1.355881 | a |
| MX-O-R | 0.940071 | 0.125462 | 78 | 0.538238 | 1.341903 | a |
| COMM | 0.910784 | 0.125462 | 78 | 0.508951 | 1.312616 | a |
| MX-L-E | 0.872651 | 0.125462 | 78 | 0.470819 | 1.274484 | a |
| MX-L-R | 0.802559 | 0.125462 | 78 | 0.400727 | 1.204392 | ab |
| MX-H-E | 0.666906 | 0.125462 | 78 | 0.265074 | 1.068739 | ab |
| VA-L-E | 0.664529 | 0.125462 | 78 | 0.262697 | 1.066362 | ab |
| MX-H-R | 0.64371 | 0.125462 | 78 | 0.241878 | 1.045543 | ab |
| EN-H-E | 0.6311 | 0.125462 | 78 | 0.229268 | 1.032933 | ab |
| ED-H-E | 0.613647 | 0.125462 | 78 | 0.211815 | 1.01548 | ab |
| ED-L-E | 0.566452 | 0.125462 | 78 | 0.16462 | 0.968285 | ab |
| VA-O-R | 0.558163 | 0.125462 | 78 | 0.15633 | 0.959995 | ab |
| VA-O-E | 0.549639 | 0.125462 | 78 | 0.147806 | 0.951471 | ab |
| VA-H-R | 0.521647 | 0.125462 | 78 | 0.119815 | 0.92348 | ab |
| EN-L-E | 0.516896 | 0.125462 | 78 | 0.115063 | 0.918728 | ab |
| EN-H-R | 0.470198 | 0.125462 | 78 | 0.068365 | 0.87203 | ab |
| VA-L-R | 0.465188 | 0.125462 | 78 | 0.063355 | 0.86702 | ab |
| ED-L-R | 0.459316 | 0.125462 | 78 | 0.057483 | 0.861148 | ab |
| EN-O-E | 0.45926 | 0.125462 | 78 | 0.057427 | 0.861092 | ab |
| CTRL | 0.452803 | 0.125462 | 78 | 0.050971 | 0.854636 | ab |
| VA-H-E | 0.45045 | 0.125462 | 78 | 0.048617 | 0.852282 | ab |
| ED-H-R | 0.413923 | 0.125462 | 78 | 0.012091 | 0.815756 | ab |
| ED-O-E | 0.314185 | 0.125462 | 78 | -0.08765 | 0.716018 | ab |
| EN-O-R | 0.308536 | 0.125462 | 78 | -0.0933 | 0.710368 | ab |
| EN-L-R | 0.306875 | 0.125462 | 78 | -0.09496 | 0.708707 | ab |
| ED-O-R | 0.182234 | 0.125462 | 78 | -0.2196 | 0.584066 | b |

# S5. Effects of aquatic-weed fertilizers on plant morphology and physiological status

## **Table S5.1.** Factorial ANOVA results for plant height

| **Source of variation** | **Sum Sq** | **Df** | **F value** | **Pr(>F)** |
| --- | --- | --- | --- | --- |
| Type | 26.20688 | 3 | 5.845943 | 0.001245 |
| Dose | 0.086667 | 2 | 0.028999 | 0.971429 |
| Form | 1.28 | 1 | 0.856585 | 0.357788 |
| Type:Dose | 19.42792 | 6 | 2.166884 | 0.056078 |
| Type:Form | 4.735938 | 3 | 1.056441 | 0.373064 |
| Dose:Form | 1.3725 | 2 | 0.459243 | 0.633599 |
| Type:Dose:Form | 10.07729 | 6 | 1.123966 | 0.35717 |
| Residuals | 107.59 | 72 | NA | NA |

## **Table S5.2.** Factorial ANOVA results for leaf number

| **Source of variation** | **Sum Sq** | **Df** | **F value** | **Pr(>F)** |
| --- | --- | --- | --- | --- |
| Type | 6.6875 | 3 | 4.223684 | 0.008286 |
| Dose | 0.166667 | 2 | 0.157895 | 0.854235 |
| Form | 0.5 | 1 | 0.947368 | 0.333649 |
| Type:Dose | 1.625 | 6 | 0.513158 | 0.796497 |
| Type:Form | 0.84375 | 3 | 0.532895 | 0.661184 |
| Dose:Form | 0.75 | 2 | 0.710526 | 0.494798 |
| Type:Dose:Form | 4.6875 | 6 | 1.480263 | 0.197146 |
| Residuals | 38 | 72 | NA | NA |

## **Table S5.3.** One-way ANOVA results for plant height across fertilizer treatments

| **Source of variation** | **Df** | **Sum Sq** | **Mean Sq** | **F value** | **Pr(>F)** |
| --- | --- | --- | --- | --- | --- |
| Treatment | 25 | 259.8335 | 10.39334 | 7.407533 | 3.90E-12 |
| Residuals | 78 | 109.44 | 1.403077 | NA | NA |

## **Table S5.4.** One-way ANOVA results for leaf number across fertilizer treatments

|  | **Df** | **Sum Sq** | **Mean Sq** | **F value** | **Pr(>F)** |
| --- | --- | --- | --- | --- | --- |
| Treatment | 25 | 55.24038 | 2.209615 | 4.447742 | 2.10E-07 |
| Residuals | 78 | 38.75 | 0.496795 | NA | NA |

## **Table S5.5.** Factorial ANOVA results for chlorophyll index (SPAD)

| **Source of variation** | **Sum Sq** | **Df** | **F value** | **Pr(>F)** |
| --- | --- | --- | --- | --- |
| Type | 14.88688 | 3 | 0.958299 | 0.41722 |
| Dose | 22.37167 | 2 | 2.160166 | 0.122722 |
| Form | 1.62 | 1 | 0.312848 | 0.577673 |
| Type:Dose | 55.68292 | 6 | 1.792212 | 0.112771 |
| Type:Form | 0.338438 | 3 | 0.021786 | 0.995601 |
| Dose:Form | 6.390833 | 2 | 0.617087 | 0.542342 |
| Type:Dose:Form | 23.12271 | 6 | 0.744228 | 0.615881 |
| Residuals | 372.8325 | 72 | NA | NA |

## **Table S5.6.** One-way ANOVA results for chlorophyll index (SPAD) across fertilizer treatments

| **Source of variation** | **Df** | **Sum Sq** | **Mean Sq** | **F value** | **Pr(>F)** |
| --- | --- | --- | --- | --- | --- |
| Treatment | 25 | 267.2088 | 10.68835 | 1.931093 | 0.014881 |
| Residuals | 78 | 431.72 | 5.534872 | NA | NA |

## **Table S5.7.** Tukey’s HSD post hoc grouping for chlorophyll index (SPAD)

| **Treatment** | **emmean** | **SE** | **df** | **lower.CL** | **upper.CL** | **.group** |
| --- | --- | --- | --- | --- | --- | --- |
| MX-O-E | 49.725 | 1.176315 | 78 | 45.95747 | 53.49253 | a |
| EN-O-E | 49.325 | 1.176315 | 78 | 45.55747 | 53.09253 | ab |
| VA-L-R | 48.575 | 1.176315 | 78 | 44.80747 | 52.34253 | ab |
| VA-O-R | 48.5 | 1.176315 | 78 | 44.73247 | 52.26753 | ab |
| VA-H-R | 48.475 | 1.176315 | 78 | 44.70747 | 52.24253 | ab |
| EN-H-E | 48.425 | 1.176315 | 78 | 44.65747 | 52.19253 | ab |
| VA-O-E | 47.675 | 1.176315 | 78 | 43.90747 | 51.44253 | ab |
| MX-H-E | 47.675 | 1.176315 | 78 | 43.90747 | 51.44253 | ab |
| VA-H-E | 47.675 | 1.176315 | 78 | 43.90747 | 51.44253 | ab |
| VA-L-E | 47.675 | 1.176315 | 78 | 43.90747 | 51.44253 | ab |
| MX-O-R | 47.05 | 1.176315 | 78 | 43.28247 | 50.81753 | ab |
| MX-L-R | 47.05 | 1.176315 | 78 | 43.28247 | 50.81753 | ab |
| CTRL | 46.7 | 1.176315 | 78 | 42.93247 | 50.46753 | ab |
| ED-H-E | 46.425 | 1.176315 | 78 | 42.65747 | 50.19253 | ab |
| MX-L-E | 46.375 | 1.176315 | 78 | 42.60747 | 50.14253 | ab |
| EN-H-R | 46.35 | 1.176315 | 78 | 42.58247 | 50.11753 | ab |
| EN-L-R | 46.1 | 1.176315 | 78 | 42.33247 | 49.86753 | ab |
| ED-L-R | 45.975 | 1.176315 | 78 | 42.20747 | 49.74253 | ab |
| ED-H-R | 45.75 | 1.176315 | 78 | 41.98247 | 49.51753 | ab |
| EN-L-E | 45.7 | 1.176315 | 78 | 41.93247 | 49.46753 | ab |
| EN-O-R | 45.4 | 1.176315 | 78 | 41.63247 | 49.16753 | ab |
| ED-L-E | 45.075 | 1.176315 | 78 | 41.30747 | 48.84253 | ab |
| MX-H-R | 44.925 | 1.176315 | 78 | 41.15747 | 48.69253 | ab |
| ED-O-R | 44.925 | 1.176315 | 78 | 41.15747 | 48.69253 | ab |
| COMM | 44.025 | 1.176315 | 78 | 40.25747 | 47.79253 | ab |
| ED-O-E | 43.1 | 1.176315 | 78 | 39.33247 | 46.86753 | b |
